# Supplementary material
Source: MDPI journal article supplement (https://www.mdpi.com/2073-4441/14/13/2119)
Supplement: s1 [file s1]

**Table S1.** Simulation results of the IFTSP model in the first planning period.

| Region     | Department   | Reused water           |                        |                        |
|------------|--------------|------------------------|------------------------|------------------------|
|            |              | t=1                    | t =2                   | t =3                   |
| Panshi     | industrial   | [0.00, 0.00]           | [0.00, 0.00]           | [0.00, 0.00]           |
|            | municipal    | [0.00, 0.00]           | [0.00, 0.00]           | [0.00, 0.00]           |
|            | ecological   | [0.00, 0.00]           | [0.00, 0.00]           | [0.00, 0.00]           |
|            | agricultural | [0.00, 0.00]           | [0.00, 0.00]           | [0.00, 0.00]           |
| Yongji     | industrial   | [0.00, 0.00]           | [0.00, 0.00]           | [0.00, 0.00]           |
|            | municipal    | [0.00, 0.00]           | [0.00, 0.00]           | [0.00, 0.00]           |
|            | ecological   | [0.00, 0.00]           | [0.00, 0.00]           | [0.00, 0.00]           |
|            | agricultural | [0.00, 0.00]           | [0.00, 0.00]           | [0.00, 0.00]           |
| Shuangyang | industrial   | [0.00, 0.00]           | [0.00, 0.00]           | [0.00, 0.00]           |
|            | municipal    | [0.00, 0.00]           | [0.00, 0.00]           | [0.00, 0.00]           |
|            | ecological   | [0.00, 0.00]           | [0.00, 0.00]           | [0.00, 0.00]           |
|            | agricultural | [0.00, 0.00]           | [0.00, 0.00]           | [0.00, 0.00]           |
| Jiutai     | industrial   | [0.00, 0.00]           | [0.00, 0.00]           | [0.00, 0.00]           |
|            | municipal    | [0.00, 0.00]           | [0.00, 0.00]           | [0.00, 0.00]           |
|            | ecological   | [0.00, 0.00]           | [0.00, 0.00]           | [0.00, 0.00]           |
|            | agricultural | [0.00, 0.00]           | [0.00, 0.00]           | [0.00, 0.00]           |
| Dehui      | industrial   | [656.98, 1938.10]      | [656.98, 1938.10]      | [656.98, 1938.10]      |
|            | municipal    | [0.00, 0.00]           | [0.00, 0.00]           | [0.00, 0.00]           |
|            | ecological   | [0.00, 0.00]           | [0.00, 0.00]           | [0.00, 0.00]           |
|            | agricultural | [13,745.70, 16,867.60] | [13,745.70, 16,867.60] | [12,542.70, 16,867.60] |
| Yitong     | industrial   | [94.94, 94.94]         | [94.94, 94.94]         | [94.94, 94.94]         |
|            | municipal    | [0.00, 0.00]           | [0.00, 0.00]           | [0.00, 0.00]           |
|            | ecological   | [0.00, 0.00]           | [0.00, 0.00]           | [0.00, 0.00]           |
|            | agricultural | [0.00, 0.00]           | [0.00, 0.00]           | [0.00, 0.00]           |
| Changcuhn  | industrial   | [1132.20, 2053.00]     | [0.00, 786.20]         | [0.00, 0.00]           |
|            | municipal    | [0.00, 40.83]          | [0.00, 40.83]          | [0.00, 40.83]          |
|            | ecological   | [0.00, 0.00]           | [0.00, 0.00]           | [0.00, 0.00]           |
|            | agricultural | [3381.60, 4149.61]     | [3381.60, 4149.61]     | [3381.60, 4149.61]     |

|        |              |                   |                   |                   |
|--------|--------------|-------------------|-------------------|-------------------|
| Nongan | industrial   | [0.00, 1612.20]   | [0.00, 1612.20]   | [0.00, 1612.20]   |
|        | municipal    | [0.00, 0.00]      | [0.00, 0.00]      | [0.00, 0.00]      |
|        | ecological   | [0.00, 0.00]      | [0.00, 0.00]      | [0.00, 0.00]      |
|        | agricultural | [0.00, 26,136.80] | [0.00, 26,136.80] | [0.00, 26,136.80] |

**Table S2.** Simulation results of the IFTSP model in the second planning period.

| Region     | Department   | Reused water        |                     |                     |
|------------|--------------|---------------------|---------------------|---------------------|
|            |              | h=1                 | h=2                 | h=3                 |
| Panshi     | industrial   | [0.00, 0.00]        | [0.00, 0.00]        | [0.00, 0.00]        |
|            | municipal    | [0.00, 0.00]        | [0.00, 0.00]        | [0.00, 0.00]        |
|            | ecological   | [0.00, 0.00]        | [0.00, 0.00]        | [0.00, 0.00]        |
|            | agricultural | [0.00, 0.00]        | [0.00, 0.00]        | [0.00, 0.00]        |
| Yongji     | industrial   | [0.00, 0.00]        | [0.00, 0.00]        | [0.00, 0.00]        |
|            | municipal    | [0.00, 0.00]        | [0.00, 0.00]        | [0.00, 0.00]        |
|            | ecological   | [0.00, 0.00]        | [0.00, 0.00]        | [0.00, 0.00]        |
|            | agricultural | [0.00, 0.00]        | [0.00, 0.00]        | [0.00, 0.00]        |
| Shuangyang | industrial   | [0.00, 0.00]        | [0.00, 0.00]        | [0.00, 0.00]        |
|            | municipal    | [0.00, 0.00]        | [0.00, 0.00]        | [0.00, 0.00]        |
|            | ecological   | [0.00, 0.00]        | [0.00, 0.00]        | [0.00, 0.00]        |
|            | agricultural | [0.00, 0.00]        | [0.00, 0.00]        | [0.00, 0.00]        |
| Jiutai     | industrial   | [0.00, 0.00]        | [0.00, 0.00]        | [0.00, 0.00]        |
|            | municipal    | [0.00, 0.00]        | [0.00, 0.00]        | [0.00, 0.00]        |
|            | ecological   | [0.00, 0.00]        | [0.00, 0.00]        | [0.00, 0.00]        |
|            | agricultural | [0.00, 0.00]        | [0.00, 0.00]        | [0.00, 0.00]        |
| Dehui      | industrial   | [656.98, 2334.00]   | [656.98, 1768.50]   | [656.98, 1175.28]   |
|            | municipal    | [0.00, 0.00]        | [0.00, 0.00]        | [0.00, 0.00]        |
|            | ecological   | [0.00, 0.00]        | [0.00, 0.00]        | [0.00, 0.00]        |
|            | agricultural | [6062.65, 16953.00] | [6062.65, 16953.00] | [6062.65, 16953.00] |
| Yitong     | industrial   | [108.71, 131.50]    | [108.71, 131.50]    | [108.71, 131.50]    |
|            | municipal    | [0.00, 0.00]        | [0.00, 0.00]        | [0.00, 0.00]        |
|            | ecological   | [0.00, 0.00]        | [0.00, 0.00]        | [0.00, 0.00]        |
|            | agricultural | [0.00, 0.00]        | [0.00, 0.00]        | [0.00, 0.00]        |

|           |              |                   |                   |                   |
|-----------|--------------|-------------------|-------------------|-------------------|
| Changcuhn | industrial   | [0.00, 4768.69]   | [0.00, 3309.00]   | [0.00, 1777.00]   |
|           | municipal    | [0.00, 41.34]     | [0.00, 41.34]     | [0.00, 41.34]     |
|           | ecological   | [0.00, 0.00]      | [0.00, 0.00]      | [0.00, 0.00]      |
|           | agricultural | [0.00, 4170.60]   | [0.00, 4170.60]   | [0.00, 4170.60]   |
| Nongan    | industrial   | [0.00, 1612.20]   | [0.00, 1612.20]   | [0.00, 1612.20]   |
|           | municipal    | [0.00, 0.00]      | [0.00, 0.00]      | [0.00, 0.00]      |
|           | ecological   | [0.00, 0.00]      | [0.00, 0.00]      | [0.00, 0.00]      |
|           | agricultural | [0.00, 26,136.80] | [0.00, 26,136.80] | [0.00, 26,136.80] |

**Table S3.** Simulation results of the IFTSP model in the third planning period.

| Region     | Water sector | Reused water        |                     |                     |
|------------|--------------|---------------------|---------------------|---------------------|
|            |              | h=1                 | h=2                 | h=3                 |
| Panshi     | industrial   | [0.00, 0.00]        | [0.00, 0.00]        | [0.00, 0.00]        |
|            | municipal    | [0.00, 0.00]        | [0.00, 0.00]        | [0.00, 0.00]        |
|            | ecological   | [0.00, 0.00]        | [0.00, 0.00]        | [0.00, 0.00]        |
|            | agricultural | [0.00, 0.00]        | [0.00, 0.00]        | [0.00, 0.00]        |
| Yongji     | industrial   | [0.00, 0.00]        | [0.00, 0.00]        | [0.00, 0.00]        |
|            | municipal    | [0.00, 0.00]        | [0.00, 0.00]        | [0.00, 0.00]        |
|            | ecological   | [0.00, 0.00]        | [0.00, 0.00]        | [0.00, 0.00]        |
|            | agricultural | [0.00, 0.00]        | [0.00, 0.00]        | [0.00, 0.00]        |
| Shuangyang | industrial   | [0.00, 0.00]        | [0.00, 0.00]        | [0.00, 0.00]        |
|            | municipal    | [0.00, 0.00]        | [0.00, 0.00]        | [0.00, 0.00]        |
|            | ecological   | [0.00, 0.00]        | [0.00, 0.00]        | [0.00, 0.00]        |
|            | agricultural | [0.00, 0.00]        | [0.00, 0.00]        | [0.00, 0.00]        |
| Jiutai     | industrial   | [0.00, 0.00]        | [0.00, 0.00]        | [0.00, 0.00]        |
|            | municipal    | [0.00, 0.00]        | [0.00, 0.00]        | [0.00, 0.00]        |
|            | ecological   | [0.00, 0.00]        | [0.00, 0.00]        | [0.00, 0.00]        |
|            | agricultural | [0.00, 0.00]        | [0.00, 0.00]        | [0.00, 0.00]        |
| Dehui      | industrial   | [656.98, 3421.49]   | [656.98, 2773.49]   | [656.98, 2177.93]   |
|            | municipal    | [0.00, 0.00]        | [0.00, 0.00]        | [0.00, 0.00]        |
|            | ecological   | [0.00, 0.00]        | [0.00, 0.00]        | [0.00, 0.00]        |
|            | agricultural | [8673.13, 13531.82] | [8673.13, 13531.82] | [8673.13, 13531.82] |

|           |              |                   |                   |                   |
|-----------|--------------|-------------------|-------------------|-------------------|
| Yitong    | industrial   | [41.18, 147.93]   | [41.18, 147.93]   | [41.18, 147.93]   |
|           | municipal    | [0.00, 0.00]      | [0.00, 0.00]      | [0.00, 0.00]      |
|           | ecological   | [0.00, 0.00]      | [0.00, 0.00]      | [0.00, 0.00]      |
|           | agricultural | [0.00, 0.00]      | [0.00, 0.00]      | [0.00, 0.00]      |
| Changcuhn | industrial   | [0.00, 6736.44]   | [0.00, 5084.31]   | [0.00, 3351.41]   |
|           | municipal    | [0.00, 950.40]    | [0.00, 950.40]    | [0.00, 950.40]    |
|           | ecological   | [0.00, 0.00]      | [0.00, 0.00]      | [0.00, 0.00]      |
|           | agricultural | [0.00, 4754.80]   | [0.00, 4754.80]   | [0.00, 4754.80]   |
| Nongan    | industrial   | [0.00, 0.00]      | [0.00, 0.00]      | [0.00, 0.00]      |
|           | municipal    | [0.00, 0.00]      | [0.00, 0.00]      | [0.00, 0.00]      |
|           | ecological   | [0.00, 0.00]      | [0.00, 0.00]      | [0.00, 0.00]      |
|           | agricultural | [0.00, 26,136.80] | [0.00, 26,136.80] | [0.00, 26,136.80] |
